# Supplementary material
Source: Elsevier journal article supplement (https://rcastoragev2.blob.core.windows.net/37f6723041ac856fc45c664942fe99ed/mmc1.pdf)
Supplement: mmc1 [file mmc1.pdf]

## Supplemental Information

### Case reports

*Participant 15-0084-003* (proband) was born after a normal pregnancy, weighing 4200 g. He was cyanotic at birth and needed extra oxygen. Language development was delayed, with first words and short phrases at 39 months and severe articulation difficulties at 5 years. He showed no pretend play, but significant stereotyped play, including a special skill for building complex constructions. At the time of assessment, language skills were age-appropriate but intonation was flat and social communication markedly limited. He was socially withdrawn and resistant to change. He attended special education and had reading difficulties. He received a clinical diagnosis of autism (DSM-IV) and met criteria for autism on the Autism Diagnostic Interview-Revised (ADI-R) (1) and the Autism Diagnostic Observation Schedule (ADOS) (2).

*Participant 15-0084-004* was born after a normal pregnancy, weighing 3950 g. Language development was delayed (first words 30 months; phrases 42 months). He used stereotyped language and reciprocity in communication or social interaction was markedly limited. He showed no pretend or social play. At the time of assessment, his language skills were age-appropriate and reciprocity in communication was improved. Eye contact and facial expression were markedly limited. He showed ritualistic behavior, stereotyped hand and finger movements and resistance to change. He was clinically diagnosed with autism (DSM-IV) and met criteria for autism on the ADI-R and ASD on the ADOS. Despite a normal intelligence, he was also diagnosed with dyslexia and so receives special education. A normal karyotype was observed and molecular testing for Fragile X was negative.

*Participant 15-0084-005* was born without complications after a normal pregnancy, weighing 3600 g. Early development was normal and there were no concerns about her social, communication or cognitive development or physical health. Despite reading difficulties (no formal assessment or diagnosis of dyslexia), she finished high-school education.

*The father (15-0084-001)* is one of 6 children. Family history revealed fibromyalgia, breast cancer and schizophrenia among his siblings. Several family members (including the father) have social or communication difficulties; however, none have undergone formal psychiatric assessment. Among the children of the father's siblings, there are several with social communication or learning difficulties and/or with symptoms or a diagnosis of autism.

*The mother (15-0084-002)* is one of 8 children. Three other children died at birth as a result of prematurity (twins) and birth complications. Family history revealed rheumatoid arthritis and kidney dysfunction. The mother reported no difficulties in social interaction, communication ability or behavioral problems, in herself or her siblings. However, there is a family history of reading and spelling difficulties. The mother has problems with reading and spelling (although there is no formal diagnosis of dyslexia). Her brother (15-1049-001) and two of his sons (15-1049-003 and 15-1049-005) also experience significant problems with reading and spelling. Another son of 15-1049-001 was diagnosed with Asperger disorder, aged 20.

The pedigree of this family is presented in Figure 2.

#### ***Sample- selection strategy for CNTNAP5 sequencing***

Only 1 affected individual per family was selected for sequencing. From a total of 262 multiplex IMGSAC ASD families, we prioritized 143 based on non-parametric linkage (NPL) analysis per family using Merlin ([www.sph.umich.edu/csg/abecasis/Merlin](http://www.sph.umich.edu/csg/abecasis/Merlin)), using data from a previous study (3). Families for whom ASPs did not share either copy of *CNTNAP5* identical-by-decent (IBD) were removed from this sequencing effort, as it was reasoned that such families were unlikely to harbor ASD-susceptibility variants in this gene. In total, we estimate that for ~40% of families sequenced, ASPs shared both copies of *CNTNAP5* IBD, compared to the 25% that would be expected in unselected populations.

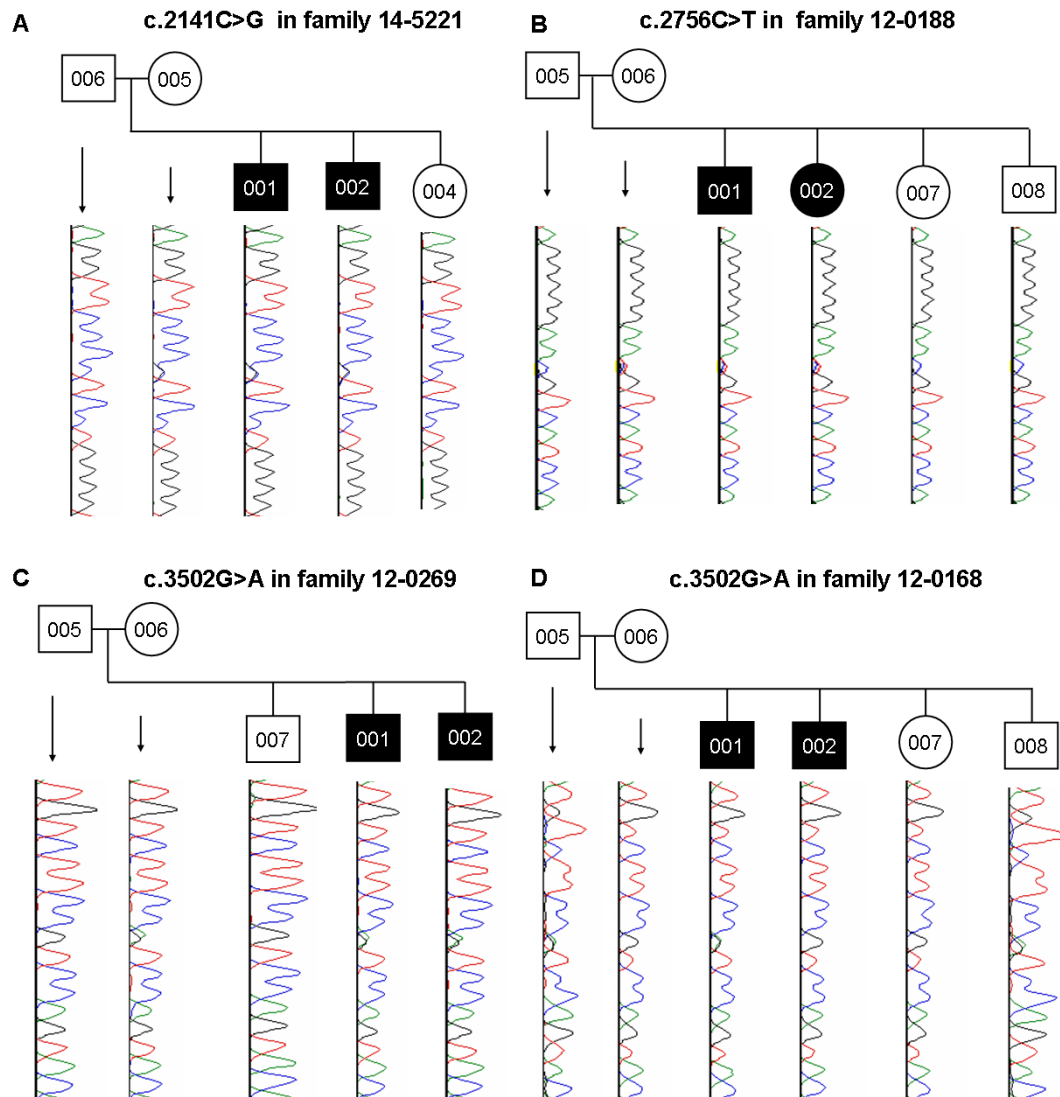

**Figure S1.** Sequencing electropherograms showing the segregation pattern of the three novel non-synonymous changes identified in *CNTNAP5*. Shaded symbols indicate ASD. All results were also confirmed with PCR-RFLP.

**Table S1.** Phenotype summary of individuals carrying *IMMP2L-DOCK4* deletion or *CNTNAP5* deletion

| Family member | Gender | Deletion status                       | Clinical report                                 | Social responsiveness         | Reading results summary | Verbal PPVT-III-NL score | Performance RAVEN SPM score | Highest level education                            | Occupation             |
|---------------|--------|---------------------------------------|-------------------------------------------------|-------------------------------|-------------------------|--------------------------|-----------------------------|----------------------------------------------------|------------------------|
| 15-0084-001   | Male   | <i>CNTNAP5</i>                        | Social communication problems                   | SRS total score 42            | Average                 | -                        | -                           | Higher Vocational Education                        | Professional           |
| 15-0084-002   | Female | <i>IMMP2L-DOCK4</i>                   | Reading/spelling difficulties                   | SRS total score 33            | Very weak               | -                        | -                           | Intermediate Vocational Training                   | None                   |
| 15-0084-003   | Male   | <i>IMMP2L-DOCK4</i><br><i>CNTNAP5</i> | Autism (DSM-IV) + reading/spelling difficulties | SRS T-score 91 (severe range) | (Low) average           | 121                      | 102                         | General Certificate of Secondary Education C level | None (student)         |
| 15-0084-004   | Male   | <i>IMMP2L-DOCK4</i><br><i>CNTNAP5</i> | Autism (DSM-IV) + dyslexia                      | SRS T-score 84 (severe range) | Very weak               | 115                      | 112                         | Elementary school                                  | None (student)         |
| 15-0084-005   | Female | <i>IMMP2L-DOCK4</i>                   | Reading/spelling difficulties                   | SRS total score 41            | Very weak               | 122                      | 90                          | pre-university high-school education               | None (student)         |
| 15-1049-001   | Male   | <i>IMMP2L-DOCK4</i>                   | Reading/spelling difficulties                   | SRS total score 40            | Very weak               | -                        | 106                         | Intermediate Vocational Training                   | Associate professional |
| 15-1049-003   | Male   | <i>IMMP2L-DOCK4</i>                   | Reading/spelling difficulties                   | SRS total score 12            | Weak                    | -                        | 103                         | Intermediate Vocational Training                   | None (student)         |
| 15-1049-005   | Male   | <i>IMMP2L-DOCK4</i>                   | Reading/spelling difficulties                   | SRS total score 28            | Very weak               | -                        | 110                         | General Certificate of Secondary Education C level | Skilled manual         |
| 15-1085-001   | Male   | <i>IMMP2L-DOCK4</i>                   | -                                               | SRS total score 19            | (Low) average           | 105                      | 108                         | Higher Vocational Education                        | Professional           |
| 15-1086-002   | Female | <i>IMMP2L-DOCK4</i>                   | -                                               | SRS total score 29            | Average                 | 97                       | 92                          | General Certificate of Secondary Education C level | Skilled manual         |

SRS, Social Responsiveness Scale; PPVT-III-NL, Peabody Picture Vocabulary Test, 3<sup>rd</sup> edition; SPM, Standard Progressive Matrices

**Table S2.** SNP quality control data from 1M BeadArray

| Sample ID   | Calls     | No Calls | Call Rate | 10% GC Score | Correct inheritance | Mendelian errors | P-P-C Heritability |
|-------------|-----------|----------|-----------|--------------|---------------------|------------------|--------------------|
| 15-0084-001 | 1,033,134 | 15,874   | 0.985     | 0.614        | N/A                 | N/A              | N/A                |
| 15-0084-002 | 1,041,857 | 7,151    | 0.993     | 0.638        | N/A                 | N/A              | N/A                |
| 15-0084-003 | 1,046,915 | 2,093    | 0.998     | 0.649        | 1,017,702           | 8,046            | 0.992              |
| 15-0084-004 | 1,008,935 | 40,073   | 0.962     | 0.556        | 984,754             | 8,949            | 0.991              |
| 15-0084-005 | 1,016,594 | 32,414   | 0.969     | 0.577        | 1,000,735           | 880              | 0.999              |

**Table S3.** QuantiSNP CNV calls for proband 15-0084-003. All CNVs with log Bayes Factor > 10 are listed in order of how confidently they were detected. \*crosses centromere

| Chr | Start (bp)  | End (bp)    | Length (bp) | Start      | End        | No. SNPs | Copy Number | Log Bayes Factor | Gene(s)                                                                                                                                                                                     |
|-----|-------------|-------------|-------------|------------|------------|----------|-------------|------------------|---------------------------------------------------------------------------------------------------------------------------------------------------------------------------------------------|
| 7   | 110,666,487 | 111,256,808 | 590,321     | rs37715    | rs6966622  | 175      | 1           | 777.48           | <i>IMMP2L, DOCK4</i>                                                                                                                                                                        |
| 2   | 124,836,663 | 125,063,827 | 227,164     | rs11688892 | rs4848944  | 84       | 1           | 313.38           | <i>CNTNAP5</i>                                                                                                                                                                              |
| 11  | 92,396,199  | 92,543,215  | 147,016     | rs9971402  | rs10830997 | 48       | 1           | 218.91           | <i>SLC36A4</i>                                                                                                                                                                              |
| 7   | 141,412,174 | 141,439,888 | 27,714      | rs4276595  | rs4726489  | 15       | 0           | 104.08           | <i>MGAM</i>                                                                                                                                                                                 |
| 15  | 28,294,753  | 28,580,907  | 286,154     | rs4043159  | rs2648193  | 26       | 1           | 87.67            | <i>CHRFAM7A</i>                                                                                                                                                                             |
| 6   | 67,074,215  | 67,105,019  | 30,804      | rs7773946  | rs1634207  | 21       | 1           | 80.44            | -                                                                                                                                                                                           |
| 6   | 32,587,470  | 32,664,508  | 77,038      | rs35847514 | rs35283503 | 51       | 1           | 69.28            | <i>HLA-DRB5, HLA-DRB6, HLA-DRB1</i>                                                                                                                                                         |
| 9   | 138,507,667 | 138,737,806 | 230,139     | rs9314867  | rs7041513  | 96       | 3           | 61.54            | <i>NOTCH1, EGFL7, hsa-mir-126, AGPAT2, FAM69B</i>                                                                                                                                           |
| 6   | 79,029,649  | 79,090,197  | 60,548      | rs818248   | rs7773124  | 33       | 1           | 55.04            | -                                                                                                                                                                                           |
| 3   | 192,548,086 | 192,552,678 | 4,592       | rs6444540  | rs297396   | 8        | 0           | 54.07            | <i>CCDC50</i>                                                                                                                                                                               |
| 1   | 121,064,204 | 142,454,940 | 21,390,736* | rs35792998 | rs35826342 | 35       | 1           | 44.17            | -                                                                                                                                                                                           |
| 10  | 38,778,547  | 38,930,249  | 151,702     | rs28448770 | rs12161668 | 26       | 1           | 41.15            | <i>LOC399744</i>                                                                                                                                                                            |
| 8   | 7,023,889   | 8,124,711   | 1,100,822   | rs10113807 | rs3958844  | 38       | 1           | 38.47            | <i>LOC349196, DEFB109P1B, DEFB103A, DEFB103B, SPAG11B, DEFB104A, DEFB104B, DEFB106A, DEFB106B, DEFB105A, DEFB105B, DEFB107B, DEFB107A, FAM90A7, DEFB4, FAM66E, hsa-mir-548i-3, FLJ10661</i> |
| X   | 154,433,477 | 154,435,960 | 2,483       | rs6642287  | rs5940491  | 4        | 0           | 32.25            | <i>TMLHE</i>                                                                                                                                                                                |
| 7   | 61,792,309  | 62,035,077  | 242,768     | rs8188311  | rs1304186  | 27       | 3           | 30.95            | -                                                                                                                                                                                           |
| 8   | 39,351,896  | 39,460,558  | 108,662     | rs10108977 | rs7830411  | 17       | 1           | 29.91            | <i>ADAM5P, ADAM3A</i>                                                                                                                                                                       |
| 11  | 50,440,511  | 51,152,280  | 711,769     | rs11561057 | rs11522765 | 50       | 3           | 27.64            | -                                                                                                                                                                                           |
| 4   | 39,385,203  | 39,402,627  | 17,424      | rs7693996  | rs13147205 | 10       | 1           | 26.71            | <i>UBE2K</i>                                                                                                                                                                                |
| 3   | 177,371,924 | 177,390,036 | 18,112      | rs7626997  | rs2067613  | 8        | 1           | 24.89            | -                                                                                                                                                                                           |
| 4   | 92,499,956  | 92,503,958  | 4,002       | rs12507382 | rs10516891 | 4        | 0           | 23.98            | <i>FAM190A</i>                                                                                                                                                                              |
| 10  | 58,185,524  | 58,190,329  | 4,805       | rs12250344 | rs12767547 | 9        | 1           | 23.36            | -                                                                                                                                                                                           |
| 11  | 55,124,465  | 55,200,052  | 75,587      | rs596371   | rs17499045 | 33       | 1           | 22.86            | <i>OR4C11, OR4P4, OR4S2, OR4C6</i>                                                                                                                                                          |
| 1   | 3,364,220   | 3,447,155   | 82,935      | rs12745860 | rs947347   | 30       | 3           | 18.45            | <i>ARHGEF16, MEGF6</i>                                                                                                                                                                      |

|    |             |             |         |            |            |    |   |       |                                   |
|----|-------------|-------------|---------|------------|------------|----|---|-------|-----------------------------------|
| 1  | 202,176,843 | 202,184,893 | 8,050   | rs1935588  | rs12065650 | 6  | 1 | 17.66 | -                                 |
| 7  | 1,518,242   | 1,560,489   | 42,247  | rs10282181 | rs10155977 | 22 | 4 | 17.31 | <i>MAFK, TMEM184A</i>             |
| 9  | 66,464,433  | 67,055,399  | 590,966 | rs2321402  | rs12552652 | 20 | 1 | 16.89 | <i>AQP7P1, AQP7P2</i>             |
| 22 | 37,693,776  | 37,711,772  | 17,996  | rs6001344  | rs2076109  | 8  | 1 | 15.67 | <i>APOBEC3B</i>                   |
| 21 | 9,730,102   | 9,849,624   | 119,522 | rs4044122  | rs28970308 | 10 | 1 | 14.80 | -                                 |
| 2  | 146,583,025 | 146,592,386 | 9,361   | rs12465919 | rs222833   | 3  | 0 | 14.16 | -                                 |
| 6  | 32,574,137  | 32,577,503  | 3,366   | rs28877027 | rs28895902 | 2  | 0 | 13.36 | -                                 |
| 2  | 91,546,258  | 91,672,122  | 125,864 | rs12997258 | rs4509760  | 6  | 1 | 13.24 | -                                 |
| 12 | 34,320,124  | 34,435,946  | 115,822 | rs11053185 | rs11831993 | 19 | 3 | 12.95 | -                                 |
| 11 | 3,198,799   | 3,200,241   | 1,442   | rs6578334  | rs10833495 | 6  | 1 | 12.92 | <i>C11orf36</i>                   |
| 1  | 150,828,032 | 150,850,302 | 22,270  | rs12098109 | rs7526620  | 4  | 0 | 12.90 | <i>LCE3C</i>                      |
| 22 | 17,108,422  | 17,245,882  | 137,460 | rs12484661 | rs4295115  | 9  | 1 | 12.88 | <i>GGT3P</i>                      |
| 4  | 57,750,017  | 57,793,311  | 43,294  | rs13145188 | rs12500068 | 19 | 3 | 12.74 | -                                 |
| 1  | 1,148,045   | 1,168,788   | 20,743  | rs12407332 | rs12093154 | 16 | 3 | 12.58 | <i>SDF4, B3GALT6, FAM132A</i>     |
| 2  | 238,705,447 | 238,747,816 | 42,369  | rs11695472 | rs6722284  | 22 | 3 | 12.16 | <i>ESPNL, KLHL30, ILKAP</i>       |
| 1  | 72,528,637  | 72,528,687  | 50      | rs17526367 | rs2568950  | 2  | 0 | 11.58 | -                                 |
| 7  | 113,336     | 160,337     | 47,001  | rs4096522  | rs4617107  | 14 | 3 | 11.36 | -                                 |
| 16 | 35,071,364  | 35,141,900  | 70,536  | rs2219964  | rs649602   | 8  | 3 | 11.36 | -                                 |
| 10 | 41,851,973  | 41,918,278  | 66,305  | rs11266039 | rs12356349 | 9  | 1 | 11.31 | -                                 |
| 4  | 946,047     | 1,016,866   | 70,819  | rs6599390  | rs10012074 | 53 | 3 | 10.86 | <i>DGKQ, SLC26A1, IDUA, FGFR1</i> |

### Supplementary references

1. Rutter M, Le Couteur A, Lord C (2003): *Autism Diagnostic Interview-Revised (ADI-R). Manual*. Los Angeles, CA: Western Psychological Services.
2. Lord C, Rutter M, DiLavore PC, Risi S (2001): *Autism diagnostic observation schedule. Manual*. Los Angeles, CA: Western Psychological Services.
3. Szatmari P, Paterson AD, Zwaigenbaum L, Roberts W, Brian J, Liu XQ, *et al.* (2007): Mapping autism risk loci using genetic linkage and chromosomal rearrangements. *Nat Genet* 39:319-328.
